# Supplementary material
Source: PubMed Central journal article supplement (PMC2876220)
Supplement: NIHMS188302-supplement-1_si_001.pdf [file NIHMS188302-supplement-1_si_001.pdf]

## Supporting Information

### Vesicles tethered to microbubbles by hybridized DNA oligonucleotides: Flow cytometry analysis of this new drug delivery vehicle design

*Monica M. Lozano, Cambrie D. Starkel, and Marjorie L. Longo\**

Department of Chemical Engineering and Materials Science,

University of California, Davis, California 95616.

\*corresponding author: mllongo@ucdavis.edu

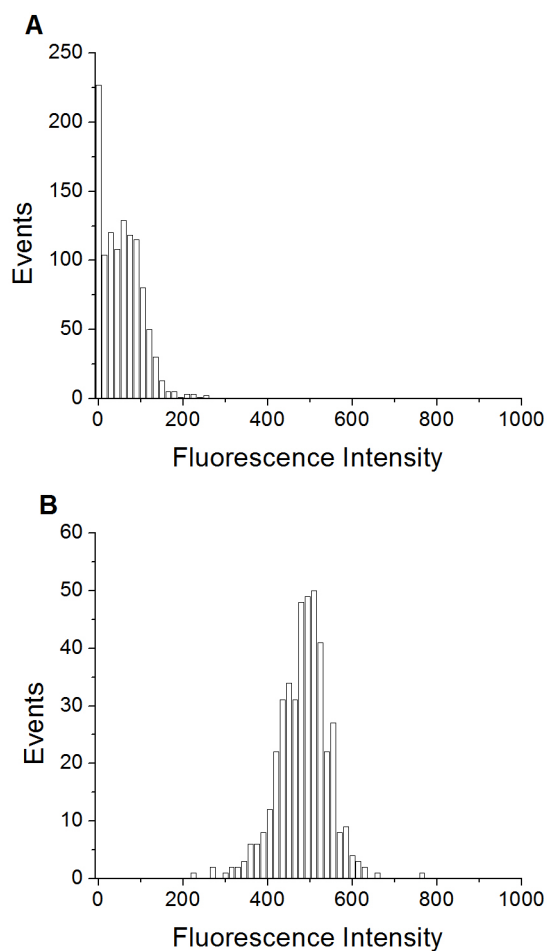

**Figure S1.** Events vs. fluorescence intensity histograms for large-sized (FS=200-300) **A)** DSPC/DPPS microbubbles; and, **B)** DSPC/DPPS microbubbles incubated with fluorescently labeled DSPC/DiC18-B' SUVs for 20 min (0nM DiC18-B – 20 min). Fluorescent probe was DiOC18.

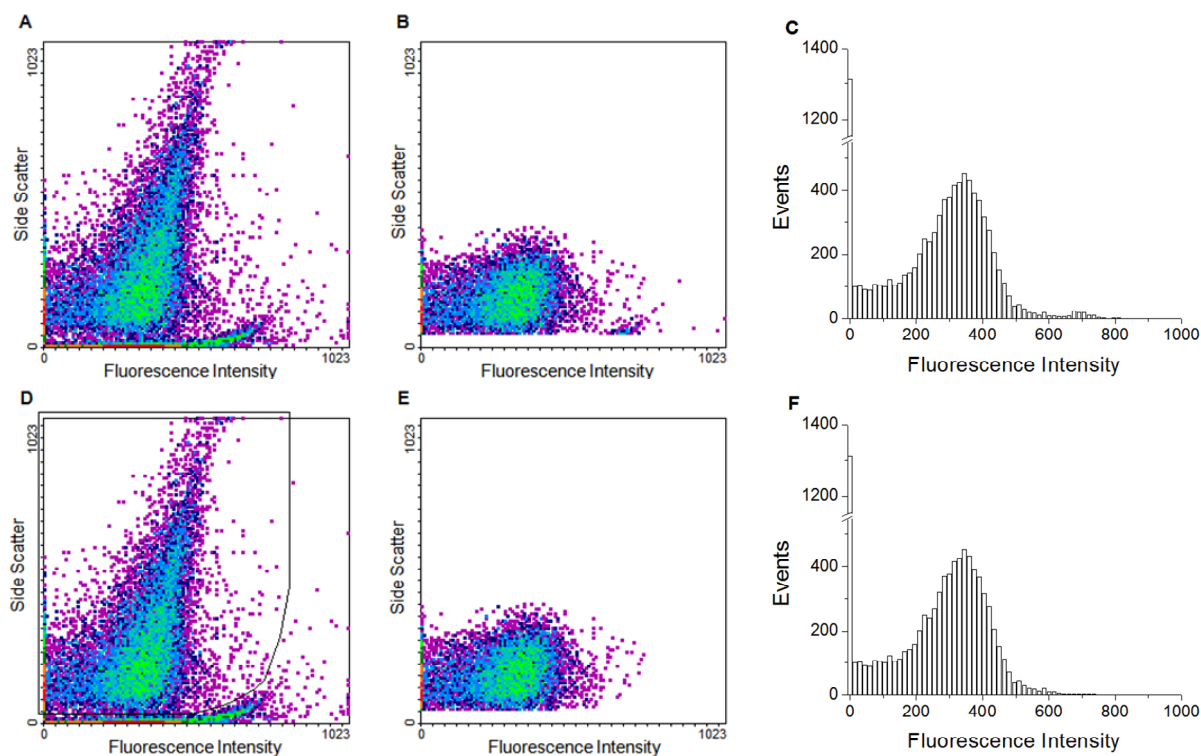

**Figure S2.** Side scatter vs. fluorescence intensity density dot plot for DSPC/DPPS microbubbles prepared with 0nM DiC18-B incubated with fluorescently labeled DSPC/DiC18-B' SUVs for 20min (0nM DiC18-B – 20 min) **A)** before the application of any gate, and **B)** after the application of FS = 0-100 gate and **C)** concomitant events vs fluorescence intensity histogram illustrating the presence of a small peak at FI ~ 700 corresponding to aggregated vesicles. Side scatter vs. fluorescence intensity density dot plot **D)** before the application of FS = 0-100 gate illustrating the location of the secondary gate, and **E)** after the application of FS = 0-100 and secondary gates and **F)** concomitant events vs. fluorescence intensity histogram illustrating the absence of the small peak at FI ~ 700 corresponding to aggregated vesicles. Highest density to lowest density order is red, green, blue, purple.

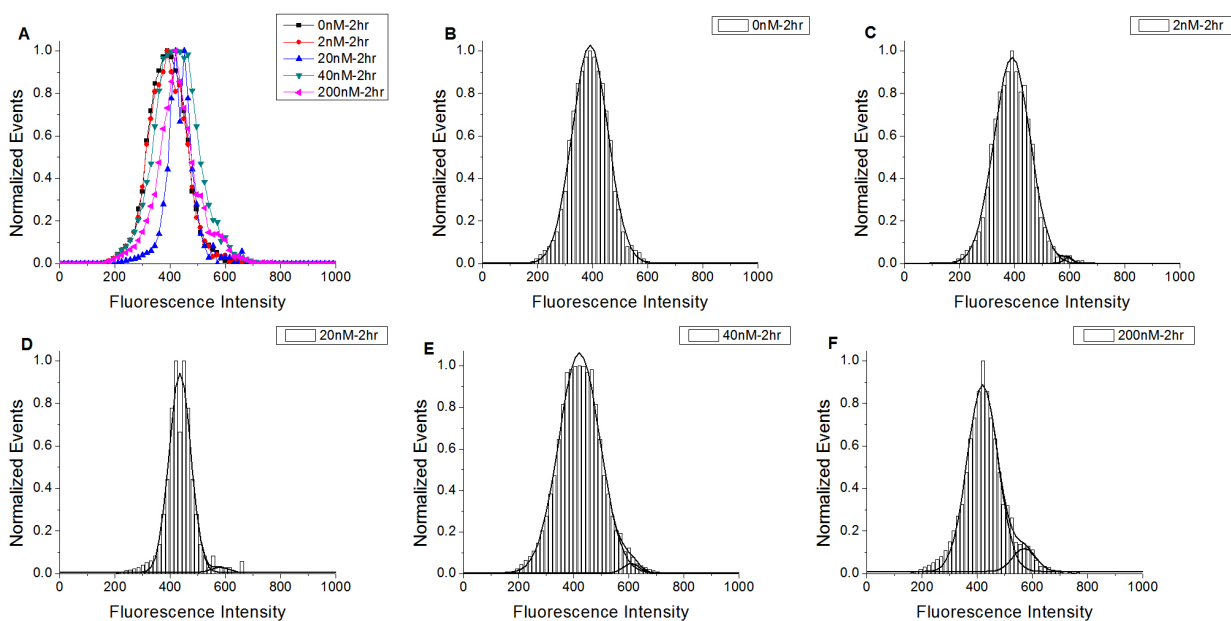

**Figure S3.** Normalized events vs. fluorescence intensity histograms for small sized (FS=0-100) DSPC/DPPS microbubbles prepared with increasing DiC18-B concentrations and incubated with fluorescently labeled DSPC/DiC18-B' SUVs for 2 h. **A)** All histogram shapes plotted without Gaussian fits; and, histogram with Gaussian fits for **B)** 0, **C)** 2, **D)** 20, **E)** 40, and **F)** 200 nM DiC18-B. Fluorescent probe was DiOC18.

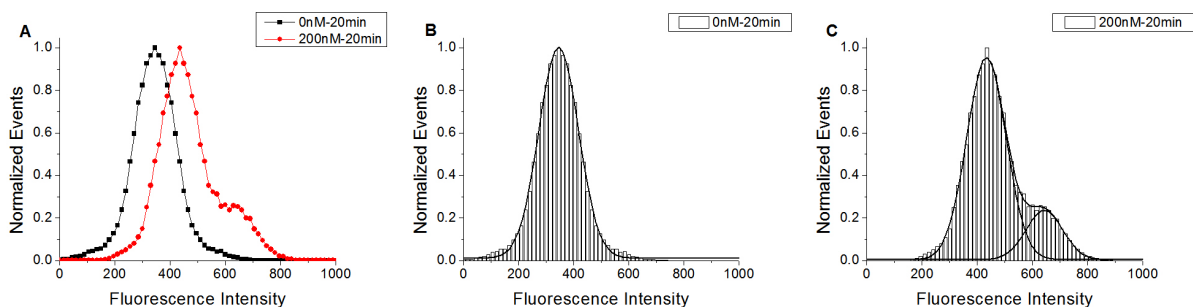

**Figure S4.** Normalized events vs. fluorescence intensity histograms for small sized (FS=0-100) DSPC/DPPS microbubbles prepared with 0 or 200 nM DiC18-B and incubated with fluorescently labeled DSPC/DiC18-B' SUVs for 20 min. **A)** Both histogram shapes plotted without Gaussian fit; and, histogram with Gaussian fits for **B)** 0 and **C)** 200 nM DiC18-B. Fluorescent probe was DiOC18.

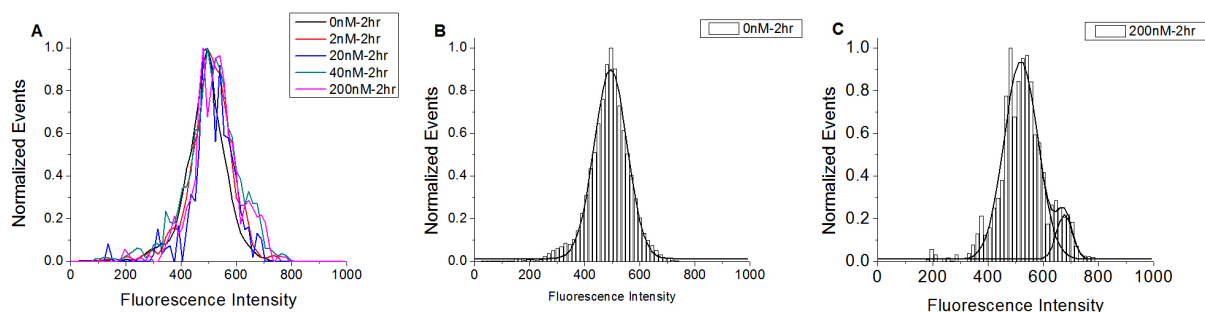

**Figure S5.** Normalized events vs. fluorescence intensity histograms for large sized (FS=200-300) DSPC/DPPS microbubbles prepared with increasing DiC18-B concentrations and incubated with fluorescently labeled DSPC/DiC18-B' SUVs for 2 h. **A)** All histogram shapes plotted without Gaussian fit; and, histogram with Gaussian fits for **B)** 0 and **C)** 200 nM DiC18-B. Fluorescent probe was DiOC18.

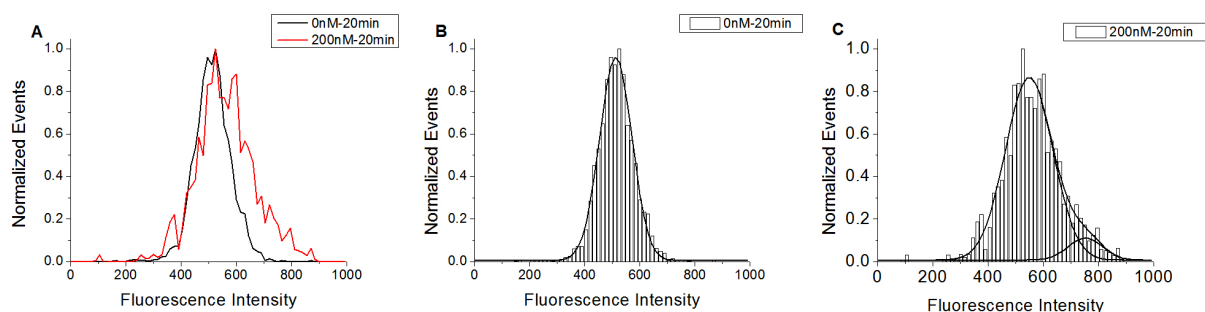

**Figure S6.** Normalized events vs. fluorescence intensity histograms for large sized (FS=200-300) DSPC/DPPS microbubbles prepared with 0 or 200 nM DiC18-B concentrations and incubated with fluorescently labeled DSPC/DiC18-B' SUVs for 20 min. **A)** Both histograms without Gaussian fit; and, histogram with Gaussian fits for **B)** 0 and **C)** 200 nM DiC18-B. Fluorescent probe was DiOC18.

**Table S1.** Summary of fitting parameters ( $p$ ,  $\mu$ , and  $\sigma$ ) obtained from one- or two-peak Gaussian fits to histograms in Figures S5 and S6 corresponding to large sized (FS=200-300) microbubbles, where  $p$ ,  $\mu$ , and  $\sigma$  represent population fraction of each peak (i.e.  $p_1 + p_2 + p_3 = 1$ ), mean fluorescence intensity (FI), and standard deviation respectively.

| <b>DiC18-B<br/>Concentration<br/>[nM]</b> | $\mu_1$<br>FI | $p_1$ | $\mu_2 \pm \sigma_2$<br>FI | $p_2$ | $\mu_3 \pm \sigma_3$<br>FI | $p_3$ |
|-------------------------------------------|---------------|-------|----------------------------|-------|----------------------------|-------|
| 0 (2 h)                                   | /             | /     | 493 $\pm$ 119              | 1     | /                          | /     |
| 200 (2 h)                                 | /             | /     | 518 $\pm$ 122              | 0.905 | 676 $\pm$ 57               | 0.095 |
| 0 (20 min)                                | /             | /     | 512 $\pm$ 118              | 1     | /                          | /     |
| 200 (20 min)                              | /             | /     | 547 $\pm$ 172              | 0.92  | 752 $\pm$ 125              | 0.080 |
